# Supplementary material for: Nucleation-controlled growth of ultra-small perovskite quantum dots for bright blue light-emitting diodes
Source: Royal Society of Chemistry journal article supplement (doi:10.1039/d1tc04400a), 2021-01-01
Supplement: d1tc04400a1.pdf [file d1tc04400a1.pdf]

Supporting Information

## Nucleation-Controlled Growth of Ultra-Small Perovskite Quantum Dots for Bright Blue Light-Emitting Diodes

Shuhua Tu,<sup>a</sup> Min Chen,<sup>a</sup> and Limin Wu<sup>\*a</sup>

<sup>a</sup> Department of Materials Science and State Key Laboratory of Molecular Engineering of Polymers, Advanced Coatings Research Center of Ministry of Education of China, Fudan University, Shanghai 200433, (P.R. China)

\*E-mail: [lmw@fudan.edu.cn](mailto:lmw@fudan.edu.cn)

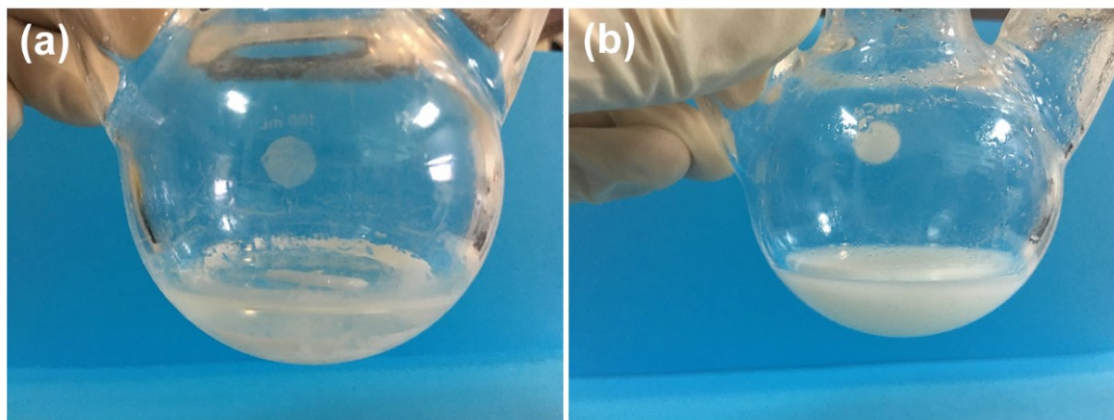

**Figure S1** (a) The photograph of  $\text{PbBr}_2$ , OA and ODE after heating and cooling down to room temperature, (b) the photograph of  $\text{PbBr}_2$ , OAm and ODE after heating and cooling down to room temperature.

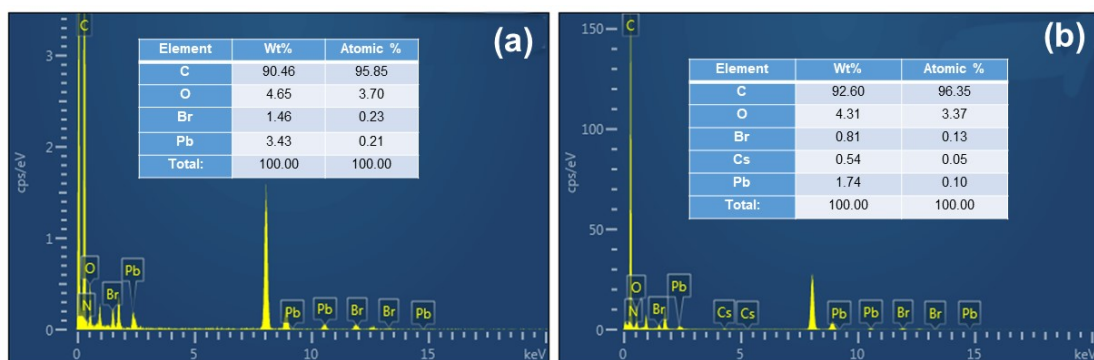

**Figure S2** (a) The energy dispersive X-ray (EDX) scan of  $\text{PbBr}_2$  clusters and its elemental contents, (b) the EDX spectrum of  $\text{CsPbBr}_3$  QDs and its elemental contents.

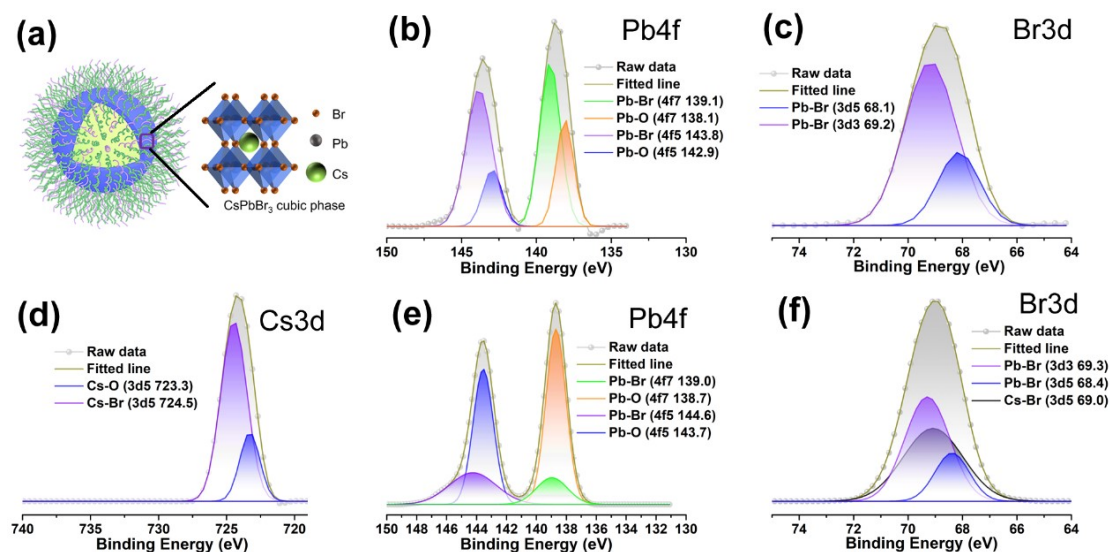

**Figure S3** (a) The schematic illustration of  $\text{CsPbBr}_3$  QDs and the crystal structure of typical cubic perovskite. High resolution XPS spectra of (b)  $\text{Pb}4f$  and (c)  $\text{Br}3d$  of  $\text{PbBr}_2$  clusters. High resolution XPS spectra of (d)  $\text{Cs}3d$ , (e)  $\text{Pb}4f$ , (f)  $\text{Br}3d$  of  $\text{CsPbBr}_3$  QDs.

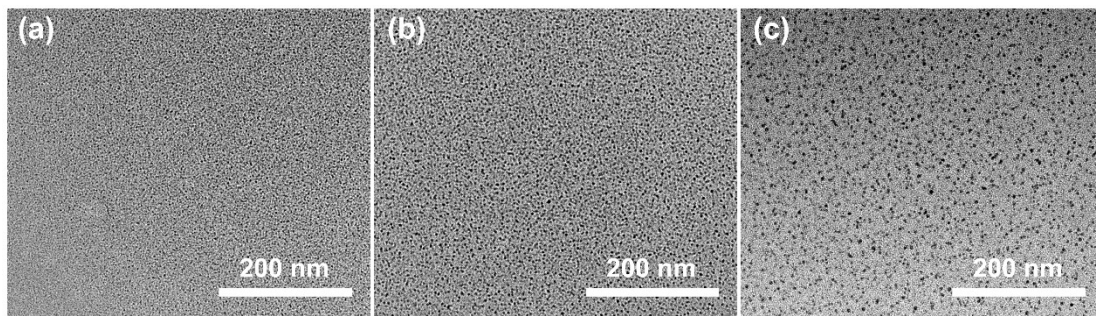

**Figure S4** The TEM images of CsPbBr<sub>3</sub> QDs prepared with Cs : Pb molar ratio of (a) 3.75%, (b) 7.5%, and (c) 22.5%.

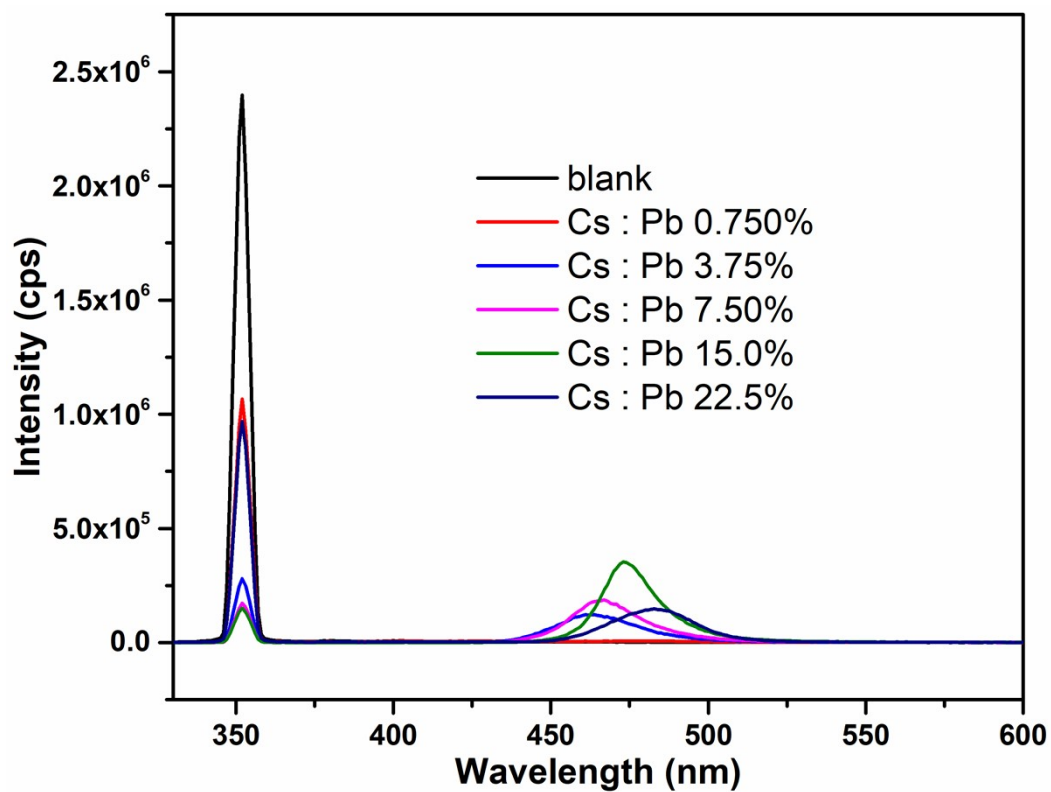

**Figure S5** The PL QY spectra of CsPbBr<sub>3</sub> QDs synthesized with different molar ratio of Cs to Pb (0.750%, 3.75%, 7.50%, 15.0%, 22.5%).

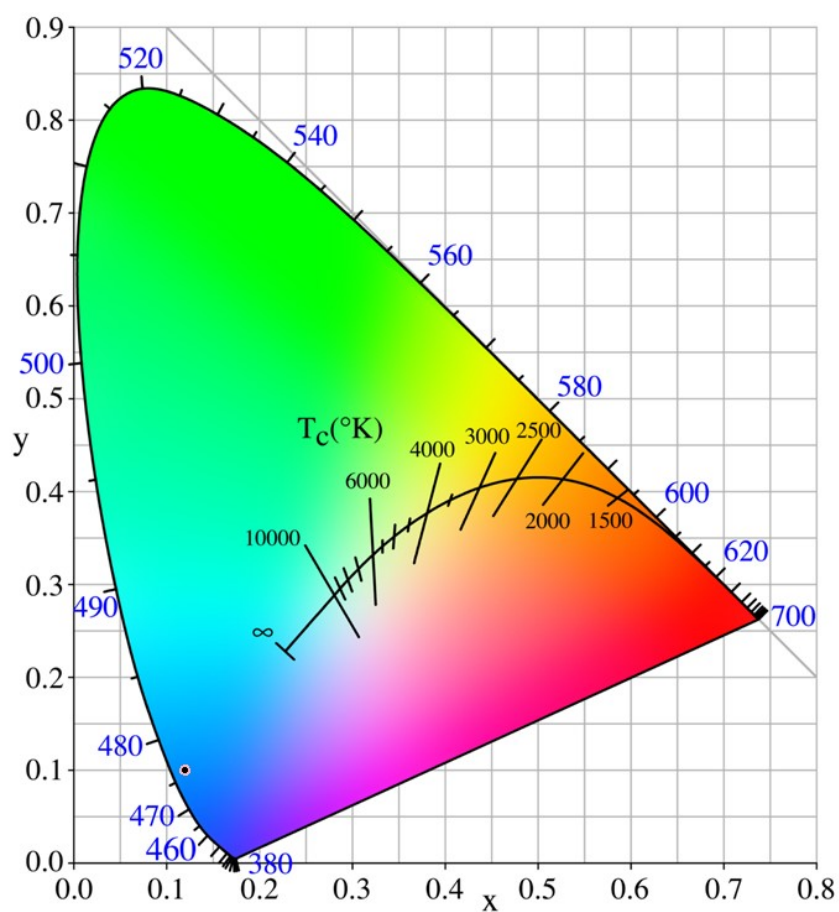

**Figure S6** The CIE chromaticity coordinate of the blue LED made with CsPbBr<sub>3</sub> QDs/FSiO<sub>2</sub> particles.

**Table S1.** The emission peaks, size and PL QYs of various blue perovskite quantum dots and nanosheets.

| Composition                                    | Emission peaks (nm) | Size (nm) | PL QYs (%) | Purification methods                         | References |
|------------------------------------------------|---------------------|-----------|------------|----------------------------------------------|------------|
| CsPbCl <sub>3</sub>                            | 405                 | ~11.0     | 10.0       | precipitation, wash                          | [1]        |
| CsPbCl <sub>1.5</sub> Br <sub>1.5</sub>        | 455                 | ~11.0     | 37.0       | precipitation, wash                          | [1]        |
| CsPbClBr <sub>2</sub>                          | 478                 | ~11.0     | 70.0       | precipitation, wash                          | [1]        |
| CsPbClBr <sub>2</sub>                          | 470                 | N/A       | ~60.0      | N/A                                          | [2]        |
| CsPbCl <sub>2</sub> Br                         | ~435                | ~14.0     | 22.0       | centrifugation, redispersed<br>by sonication | [3]        |
| CsPbBr <sub>3</sub>                            | 457                 | 3.1       | 40.3       | N/A                                          | [4]        |
| CsPbBr <sub>3</sub>                            | 465                 | 3.5       | 51.7       | N/A                                          | [4]        |
| CsPbBr <sub>3</sub>                            | 474                 | 4.1       | 69.5       | N/A                                          | [4]        |
| CsPbBr <sub>3</sub>                            | 458                 | ~7.0      | 97.0       | centrifugation, redispersed                  | [5]        |
| CsPbBr <sub>3</sub>                            | 453                 | 2.4       | 50.4       | N/A                                          | [6]        |
| Al:CsPbBr <sub>3</sub>                         | 456                 | 10.5      | 42.0       | centrifugation                               | [7]        |
| Cs <sub>3</sub> Cu <sub>2</sub> I <sub>5</sub> | 440                 | N/A       | 58.0       | filtration                                   | [8]        |
| MAPbCl <sub>3</sub>                            | 407                 | ~6.0      | --         | centrifugation                               | [9]        |
| MAPbBr <sub>3</sub>                            | 475                 | 1.8       | 74.0       | centrifugation                               | [10]       |
| MAPbBr <sub>3</sub>                            | ~465                | 3.3       | 1.2        | N/A                                          | [11]       |
| FAPbCl <sub>3</sub>                            | 415                 | 22.0      | < 1.0      | centrifugation                               | [12]       |
| FAPbCl <sub>1.5</sub> Br <sub>1.5</sub>        | ~478                | --        | 21.0       | centrifugation                               | [12]       |
| CsPbBr <sub>3</sub>                            | 471                 | 3.8       | 64.8       | no need                                      | this work  |

**Table S2.** The maximum absorption transition peaks, emission peaks, FWHMs, PL

QYs and PL lifetime of CsPbBr<sub>3</sub> QDs synthesized under different temperature with 0.2 mL Cs-oleate.

| Temperature<br>(°C) | Absorption<br>(nm) | Emission<br>(nm) | FWHM (nm) | PL QY (%) |
|---------------------|--------------------|------------------|-----------|-----------|
| 30                  | 446                | 463              | 18        | 26.05     |
| 50                  | 448                | 466              | 19        | 29.06     |
| 70                  | 450                | 471              | 26        | 64.84     |
| 90                  | 455                | 477              | 28        | 51.87     |
| 110                 | 463                | 497              | 29        | 19.56     |

**Table S3.** The PL emission peaks and FWHM of the mixture solution of blue CsPbBr<sub>3</sub> QDs and green CsPbBr<sub>3</sub> QDs synthesized by hot injection at 0, 10, 20, 30, 40 min.

| N/A                                              | Emission (nm) | FWHM (nm) |
|--------------------------------------------------|---------------|-----------|
| Blue CsPbBr <sub>3</sub> QDs                     | 467           | 21        |
| Green CsPbBr <sub>3</sub> QDs<br>(hot injection) | 510           | 18        |
| 0 min                                            | 468, 507      | 21        |
| 10 min                                           | 468, 507      | 21        |
| 20 min                                           | 468, 507      | 21        |
| 30 min                                           | 468, 507      | 21        |
| 40 min                                           | 468, 507      | 21        |

## References

- 1 X. M. Li, Y. Wu, S. L. Zhang, B. Cai, Y. Gu, J. Z. Song, H. B. Zeng, *Adv. Funct.*

- Mater.*, 2016, **26**, 2435-2445.
- 2 C. H. Wang, D. B. Han, J. H. Wang, Y. G. Yang, X. Y. Liu, S. Huang, X. Zhang, S. Chang, K. F. Wu, H. Z. Zhong, *Nat. Commun.*, 2020, **11**, 1-8.
  - 3 Y. Tong, E. Bladt, M. F. Ayguler, A. Manzi, K. Z. Milowska, V. A. Hintermayr, P. Docampo, S. Bals, A. S. Urban, L. Polavarapu, J. Feldmann, *Angew. Chem., Int. Edit.*, 2016, **55**, 13887-13892.
  - 4 S. B. Sun, D. Yuan, Y. Xu, A. F. Wang, Z. T. Deng, *ACS Nano*, 2016, **10**, 3648-3657.
  - 5 C. H. Bi, Z. W. Yao, X. J. Sun, X. C. Wei, J. X. Wang and J. J. Tian, *Adv. Mater.*, 2021, **33**, 2006722.
  - 6 Z. Q. Liang, S. L. Zhao, Z. Xu, B. Qiao, P. J. Song, D. Gao, X. R. Xu, *ACS Appl. Mater. Inter.*, 2016, **8**, 28824-28830.
  - 7 M. Liu, G. H. Zhong, Y. M. Yin, J. S. Miao, K. Li, C. Q. Wang, X. R. Xu, C. Shen, H. Meng, *Adv. Sci.*, 2017, **4**, 1700335.
  - 8 X. Y. Liu, Y. Yu, F. Yuan, C. J. Zhao, H. Dong, B. Jiao, Z. X. Wu, *ACS Appl. Mater. Inter.*, 2020, **12**, 52967-52975.
  - 9 F. Zhang, H. Z. Zhong, C. Chen, X. G. Wu, X. M. Hu, H. L. Huang, J. B. Han, B. S. Zou, Y. P. Dong, *ACS Nano*, 2015, **9**, 4533-4542.
  - 10 H. Huang, A. S. Susa, S. V. Kershaw, T. F. Hung, A. L. Rogach, *Adv. Sci.*, 2015, **2**, 1500194.
  - 11 V. Malgras, S. Tominaka, J. W. Ryan, J. Henzie, T. Takei, K. Ohara, Y. Yamauchi, *J. Am. Chem. Soc.*, 2016, **138**, 13874-13881.
  - 12 I. Levchuk, A. Osvet, X. F. Tang, M. Brandl, J. D. Perea, F. Hoegl, G. J. Matt, R. Hock, M. Batentschuk, C. J. Brabec, *Nano Lett.*, 2017, **17**, 2765-2770.
